# Cytokine and Cytokine-Like Inflammation Markers, Endothelial Dysfunction, and Imbalanced Coagulation in Development of Diabetes and Its Complications

Ronald B. Goldberg

Division of Endocrinology, Diabetes, and Metabolism, Diabetes Research Institute, University of Miami Miller School of Medicine, Miami, Florida 33101

**Context:** Recent developments indicate that pathophysiological mechanisms leading to  $\beta$ -cell damage, insulin resistance, and the vascular complications of diabetes include an activation of the inflammation cascade, endothelial dysfunction, and procoagulant imbalance. Their circulating biomarkers may therefore provide opportunities for early diagnosis and targets for novel treatments.

**Evidence:** Circulating biomarkers of these pathways such as  $\text{TNF}\alpha$ , IL-6, C-reactive protein (CRP) (inflammation), vascular cellular adhesion molecule-1, interstitial cellular adhesion molecule-1, E-selectin, von Willebrand factor (endothelial dysfunction), plasminogen activator inhibitor-1, fibrinogen, P-selectin (procoagulant state), and adiponectin (antiinflammation) may be associated with development of both type 1 and type 2 diabetes and some studies, particularly in type 2 diabetes, have demonstrated that certain biomarkers may have independent predictive value. Similarly studies have shown that these biomarkers may be associated with development of diabetic nephropathy and retinopathy, and again, particularly in type 2 diabetes, with cardiovascular events as well. Finally, the comorbidities of diabetes, namely obesity, insulin resistance, hyperglycemia, hypertension and dyslipidemia collectively aggravate these processes while antihyperglycemic interventions tend to ameliorate them.

**Conclusions:** Increased CRP, IL-6, and  $\text{TNF}\alpha$ , and especially interstitial cellular adhesion molecule-1, vascular cellular adhesion molecule-1, and E-selectin are associated with nephropathy, retinopathy, and cardiovascular disease in both type 1 and type 2 diabetes. Whereas further work is needed, it seems clear that these biomarkers are predictors of increasing morbidity in prediabetic and diabetic subjects and should be the focus of work testing their clinical utility to identify high-risk individuals as well as perhaps to target interventions. (*J Clin Endocrinol Metab* 94: 3171–3182, 2009)

Markers of well-accepted pathophysiologic pathways have been important in predicting development of diabetes and its complications as well as providing targets for therapy. Over recent years our understanding of the etiology of type 1 (T1D) and type 2 diabetes (T2D) and their vascular complications has widened considerably. Broadly speaking, the concept has arisen that an interplay

between inflammatory and metabolic abnormalities leads to tissue damage in diabetes. In small and large vessels, the earliest indicator of these effects is endothelial dysfunction accompanied by the development of a prothrombotic state, whereas in islets and insulin-sensitive tissues,  $\beta$ -cell damage and impaired insulin signaling are the hallmarks. This has led to the identification of an expanded array of

ISSN Print 0021-972X ISSN Online 1945-7197  
Printed in U.S.A.

Copyright © 2009 by The Endocrine Society  
doi: 10.1210/jc.2008-2534 Received November 20, 2008. Accepted June 3, 2009.  
First Published Online June 9, 2009

Abbreviations: AGE, Advanced glycation end product; CAC, coronary artery calcium; CHD, coronary heart disease; CIMT, carotid intimal medial thickness; CRP, C-reactive protein; CVD, cardiovascular disease; FFA, free fatty acid; HbA1c, glycosylated hemoglobin; ICAM, interstitial cellular adhesion molecule; IGT, impaired glucose tolerance; MCP, monocyte chemoattractant protein; NO, nitric oxide; PAI, plasminogen activator inhibitor; PPAR, peroxisomal proliferator-activated receptor; ROS, reactive oxygen species; s, soluble; T1D, type 1 diabetes; T2D, type 2 diabetes; tPA, tissue plasminogen activator; VCAM, vascular cellular adhesion molecule; vWf, von Willebrand factor.

circulating biomarkers of these processes that offer new opportunities for preemption, early diagnosis, and targeted therapy. This review focuses on developments in the identification of circulating cytokine and cytokine-like biomarkers of inflammation, endothelial dysfunction, and procoagulant imbalance and their interrelationships in the development of T1D and T2D and their vascular complications based on clinical studies.

### Inflammatory processes in diabetes

The origins of heightened inflammatory activity in diabetes are diverse. In T1D, islet inflammation is thought to be a local phenomenon driven by a focal autoimmune attack on islet antigens. By contrast, in T2D, activation of inflammation results from systemic etiologic factors, such as central obesity and insulin resistance. The comorbidities of hypertension and dyslipidemia acting in concert with hyperglycemia on the background of the differing pathophysiologies and genetic substrates of T1D and T2D have been incriminated in the maintenance and exacerbation of the inflammatory reaction. Ultimately inflammatory mediators activate a series of receptors and transcription factors such as nuclear factor- $\kappa$ B, toll-like receptors, c-Jun amino terminal kinase, and the receptor for advanced glycation end products, which lead to  $\beta$ -cell dysfunction and apoptosis, impaired insulin signaling in insulin-sensitive tissues, systemic endothelial dysfunction, and altered vascular flow.

### Activation of inflammation, endothelial dysfunction, and procoagulant pathways (Fig. 1)

An early feature of inflammation is the release of chemokines such as monocyte chemoattractant protein (MCP)-1, macrophage migration inhibition factor (MIF), and others from stressed tissues. In diabetes this has been most clearly demonstrated in vascular endothelium (1, 2) and adipose tissue (3). These factors increase expression of interstitial and vascular cellular adhesion molecules (ICAM-1, VCAM-1), and E-selectin (4) and attract monocytes and immunocytes that gain access to the stressed site.

They undergo chemokine-induced proliferation and proinflammatory gene activation producing cytokines like TNF $\alpha$ , IL-1, IL-6, IL-18, interferon- $\gamma$  (1, 5), and others. The underlying factors that stimulate expression of these genes include reactive oxygen species (ROS), oxidized lipids, reduced nitric oxide (NO), increased angiotensin II, free fatty acids (FFA) and advanced glycation end products (AGEs) (6, 7). Both endothelial cells and macrophages contribute to the generation of altered vasoreactivity and a procoagulant state through increased expression of plasminogen activator inhibitor (PAI)-1 and tissue factor and through platelet activation and acute phase reactions that increase levels of coagulation factors such as fibrinogen and factor VIII (1). Many of these molecules enter the circulation at levels that correlate with the degree of inflammatory activity. IL-6 appears to have a distinct messenger cytokine role, being the most important stimulator of C-reactive protein (CRP) production (8), a clinically relevant marker of inflammation (9).

### Adipose tissue and adipokines

Adipose tissue contributes importantly to the inflammatory process in overweight subjects in both vascular and nonvascular tissues (10). Proinflammatory and procoagulant mediators released by stressed adipose cells have both local and systemic effects on metabolism and vascular function. Adipose tissue from obese individuals contains activated macrophages that together with adipocytes produce inflammatory adipokines such as MCP-1, MIF, TNF $\alpha$ , IL-6, procoagulant substances such as PAI-1, vasoactive substances such as angiotensinogen and endothelin, and molecules that may contribute to insulin resistance such FFA, TNF $\alpha$ , and resistin (10, 11). Uniquely, adipocytes produce a collagen-like molecule, adiponectin, which enhances glucose uptake, NO production, and FFA oxidation (12); manifests antiinflammatory activity through inhibition of TNF $\alpha$ , cell adhesion molecules, and scavenger receptor expression (13); and has antiapoptotic activity in cultured  $\beta$ -cells (14). With increases in adiposity, at least partly due to suppression by TNF $\alpha$ , adiponectin levels fall in obese and diabetic individuals as well as subjects with coronary heart disease (CHD), suggesting that decreased levels of this adipokine may contribute to the metabolic and vascular abnormalities in T2D (15).

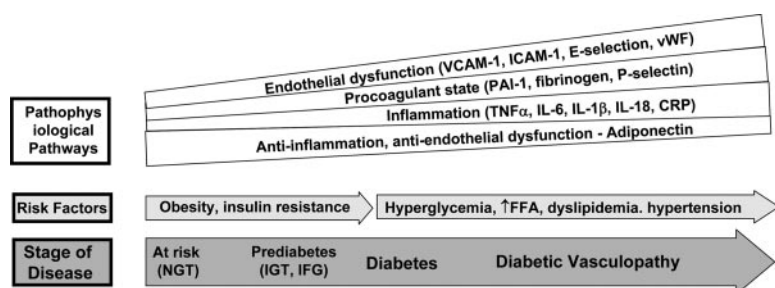

**FIG. 1.** Inflammation, endothelial dysfunction, and procoagulant state: conceptual diagram linking these pathophysiological pathways to risk factors in the progression to diabetes and its complications. NGT, Normal glucose tolerance; IFG, impaired fasting glucose.

### Biomarkers of diabetes development

#### T1D

The primary pathogenic process in T1D is mediated by cellular immune reactions, and islet autoantibodies are robust predictors of the risk of progression toward T1D. Activation of

autoimmunity enhances production of proinflammatory molecules, which may predict progression to diabetes. Thus, MIF, a proinflammatory chemokine, produced by beta cells may play a role in autoimmune insulinitis, and although serum levels are lower in subjects with recent onset T1D, decreased levels are predictive of autoantibodies (16). Increased interferon- $\gamma$ -inducible protein 10, a chemoattractant, and elevated IL-18, which up-regulates synthesis of interferon- $\gamma$  from T cells, were noted in high-risk but not low-risk normoglycemic relatives of T1D (17, 18). Levels of the chemokines CCL3 and CCL4 (chemokine C-C motif ligand 3 and 4), which have been associated with experimental insulinitis, were more likely to be elevated in high-risk antibody positive than antibody-negative relatives (19). In addition a higher frequency of high-sensitivity CRP levels greater than 0.5 mg/liter was noted in children at risk for T1D (20). Although preliminary, these findings suggest that proinflammatory pathways may be mediators of  $\beta$  cell damage, providing markers and targets for early intervention.

## T2D

**Proinflammatory, endothelial dysfunction, and procoagulant biomarkers in large prospective, observational studies of diabetes development.** The concept that heightened inflammation is important in the pathogenesis of T2D (21) is supported by evidence that inflammation in islets, adipose tissue, liver, and muscle may provoke insulin resistance and  $\beta$ -cell dysfunction (5, 22, 23) and may therefore antedate the diagnosis of diabetes. The large observational studies that have tested whether biomarkers of these pathways have predictive value for diabetes development focused on a relatively few, well-characterized markers. Initially nonspecific indicators of inflammation such as white cell count and fibrinogen were found to be predictive of incident diabetes (24, 25). Subsequently PAI-1, CRP, and fibrinogen were shown to be independent predictors (Fig. 2), with PAI-1 being least confounded by direct measures of insulin sensitivity or adiposity (26). These observations are supported by several other prospective studies, in which tissue plasminogen activator (tPA) another marker of reduced fibrinolysis (27, 28) and von Willebrand factor (vWf), a marker of endothelial injury, were predictive (29). In addition, the change in PAI-1 levels over time was also found to be an independent predictor of incident diabetes (30). The basis for the strong relationship between PAI-1 and incident diabetes is intriguing particularly because it appears not to operate through insulin resistance or obesity; other relevant influences shown to increase PAI-1 levels include angiotensin II activity, adrenal steroids, PAI-1 gene polymorphisms, and the small baby syndrome (30).

There have been many studies demonstrating an association between CRP and/or IL-6 and incident diabetes,

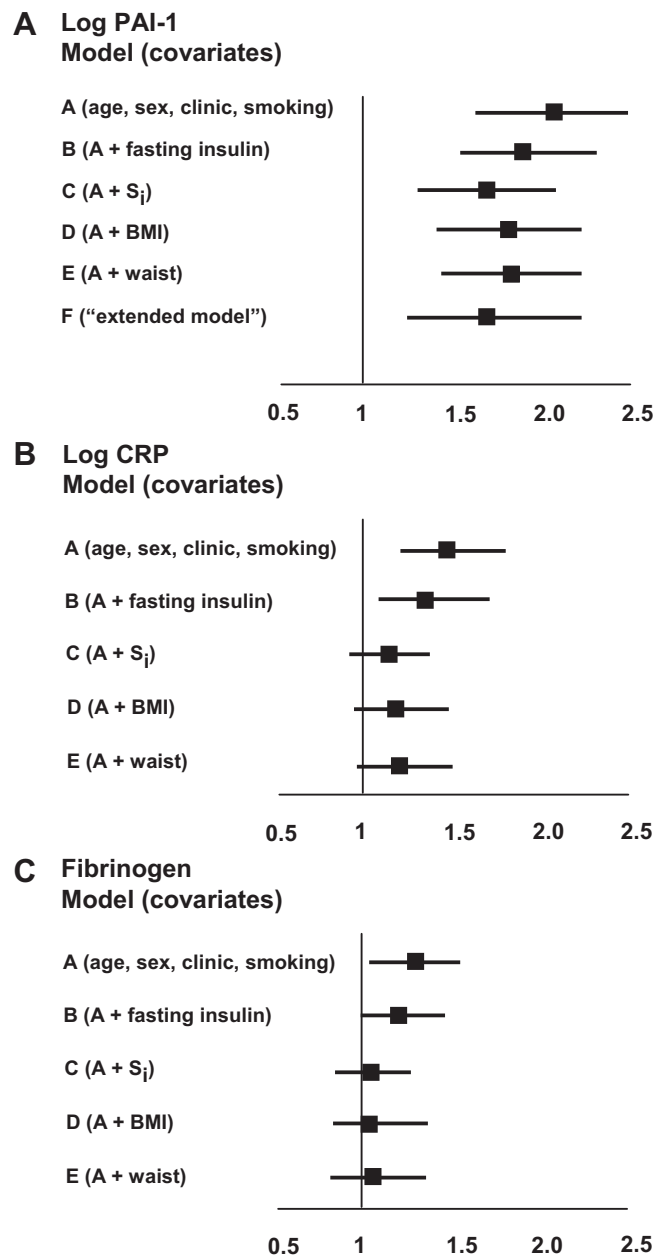

**FIG. 2.** Odds ratios (ORs) and 95% confidence intervals (CIs) for a 1 SD increase in levels of log PAI-1 (A), log CRP (B), and fibrinogen (C) in the prediction of development of type 2 diabetes. All three proteins were related to incident diabetes after adjusting for age, sex, smoking, and clinical center. When S<sub>i</sub> (insulin sensitivity index) or body mass index (BMI) was included in the model, the relation was significantly attenuated for CRP and fibrinogen, whereas PAI-1 remained significantly related to incident diabetes (model F was an extended model that included as covariates age, sex, clinical center, smoking, ethnicity, S<sub>i</sub>, BMI, family history of diabetes, and physical activity).  $P = 0.0001$  for all, except model F ( $P = 0.002$ ). [Reproduced with permission from A. Festa et al.: Diabetes 51:1131–1137. 2002 (26). ©The Endocrine Society.]

and several reported this to be independent of adiposity or insulin resistance (26, 27, 31). In addition, the early markers of inflammation, MCP-1, IL-8, and interferon- $\gamma$ -inducible protein-10, were also found to predict diabetes, with MCP-1 independent of traditional risk factors (32).

Levels of MIF, which has been shown to impair insulin signalling, are increased in impaired glucose tolerance (IGT) and still further elevated in T2D (16). A metaanalysis also showed CRP to have predictive value for diabetes but not after adjustment for diabetes risk factors, waist to hip ratio, adiponectin, and  $\gamma$ -glutamyltransferase levels (31).

Although oxidative stress is thought to play an important role in activating inflammatory genes, clinical studies of markers of oxidative stress have not been consistently associated with development of diabetes (33–38). It is possible that oxidative stress markers do not adequately reflect the impact of increased ROS on  $\beta$ -cells or insulin signaling or that inflammatory, procoagulant, or endothelial dysfunction markers are more specific because they may be more proximate to the pathophysiology of hyperglycemia.

PAI-1 is less predictive of incident diabetes in subjects with IGT than in those with normal glucose tolerance (26), raising the possibility that PAI-1 loses its specificity as subjects progress to glucose intolerance. It is therefore possible that biomarkers may vary in predictive ability during different phases in the development of T2D. Thus, whereas subjects with T2D had elevated markers of both inflammation and endothelial dysfunction, those with IGT had only elevated inflammatory markers, suggesting that more metabolic disturbance is required before sufficient endothelial dysfunction manifests (39). However, markers of endothelial function, such as soluble (s) ICAM-1 and especially E-selectin (reflecting its specificity as a marker of endothelial dysfunction) were found to be independent predictors of diabetes in the Nurses Health Study (40). Biomarker studies in which timing of development of diabetes or its complications is known may shed further light on this question.

### Adipokines and prediction of diabetes development

Several studies demonstrated that a falling adiponectin level is a strong predictor of incident diabetes independent of other risk factors (39–44) including, in one study, proinflammatory and endothelial dysfunction markers (39). Furthermore, increasing adiponectin levels induced by weight reduction was associated with a further reduction in risk (44). An exception to these findings comes from results in older adults in whom adiponectin was not an independent predictor for diabetes development when adjusted for PAI-1 (45), perhaps because adiponectin has been shown to suppress PAI-1 production in adipose tissue, indicating that they are functionally linked (46). Neither resistin nor retinol binding protein 4, adipokines associated with insulin resistance, has been shown to have value in predicting diabetes (47–49). Circulating adipocyte fatty acid binding protein, an adipokine that mediates intracellular fatty acid trafficking, was recently shown to

be predictive of T2D in a Chinese population (50). Finally, although not an adipokine, levels of plasma fetuin A, an inhibitor of insulin signaling possibly linked to fatty liver, was positively associated with diabetes risk after adjustment for standard risk factors and CRP (51).

### Implications for prevention of T2D

Overall, these findings strengthen the concept that heightened inflammation and impaired anti-inflammatory activity, endothelial dysfunction, and increased PAI-1 are part of the soil of T2D. Second, they present potential new targets for intervention. Thus, the use of the anti-inflammatory agent salsalate has been shown to improve insulin resistance, increase adiponectin, reduce CRP, and lower glucose levels in at-risk obese nondiabetic and T2D subjects (52, 53). Another example relates to the efficacy of the adiponectin activators, the peroxisomal proliferator-activated receptor (PPAR)- $\gamma$  agonists, which slow development of diabetes despite weight gain. Third, these new diabetes risk determinants may have clinical utility. In this respect PAI-1 appears to be one of the more powerful biomarker predictors for diabetes development; however, the sample requires special handling and the assay is not standardized. Adiponectin is more stable, but the assay has also not yet been standardized. On the other hand, CRP measurement procedures are well standardized. Because CRP appears to have predictive value for diabetes development, it constitutes a logical choice for further testing in high-risk situations. In addition, it may also be a novel index for the efficacy of interventions for the prevention of diabetes.

### Biomarkers associated with hyperglycemia, diabetes comorbidities, and antihyperglycemic agents

Interpretation of biomarker levels for prediction of diabetes and its complications is complicated by the presence of hyperglycemia, obesity, and other comorbidities as well as by antihyperglycemic agents that alter biomarker levels, presumably by influencing the activity of the underlying processes they reflect.

### Hyperglycemia

Hyperglycemia has been shown to enhance oxidative stress; increase nuclear factor- $\kappa$ B, TNF $\alpha$ , IL-6, and adhesion molecules; impair NO-mediated vasodilatation; and have a procoagulant effect (54). In addition, CRP levels are higher in subjects with poor glycemic control (55, 56). Higher adiponectin levels are also associated with more favorable profiles of glycemia, lipids, and inflammatory markers in T2D (57). In both T1D and T2D subjects with a severely decompensated metabolic state, CRP, PAI-1, and ROS were significantly elevated and were lowered



after resolution of the hyperglycemia (58, 59). Whereas higher glycosylated hemoglobin (HbA1c) levels are associated with lower adiponectin values in T2D (60), adiponectin levels in T1D appear to be increased, and in one study, in proportion to HbA1c levels (61).

### **Obesity, insulin resistance, hypertension, dyslipidemia, and effects of lifestyle change**

Normoglycemic obese individuals have elevated CRP, IL-6, and MCP-1 (3, 62); reduced adiponectin levels; increased PAI-1, coagulation factors (63), and markers of endothelial dysfunction; and an increase in ROS (64). The severity of many of these abnormalities is proportional to the degree of adiposity, but it is likely that the accompanying insulin resistance is a major contributor to these disturbances (65–67). In a study of T2D subjects, direct measures of insulin resistance correlated with levels of vWf, vasodilator responses, and values of PAI-1, tPA, IL-6, CRP, and TNF $\alpha$ , independent of obesity and hyperglycemia (68). These markers may also be elevated in normal-weight subjects with cardiometabolic abnormalities (69), and the presence of dyslipidemia and hypertension increases the frequency and severity of these biomarker abnormalities (70, 71). Importantly, weight reduction decreases levels of CRP, IL-6, and TNF $\alpha$ , (72) and lowers sICAM-1, sVCAM-1, and P-selectin (73). It is unclear whether the exercise-associated falls in CRP and IL-6 levels are independent of accompanying reductions in adiposity (74). A Mediterranean diet has been shown to improve markers of inflammation and endothelial dysfunction (75), whereas a eucaloric low-fat, high-carbohydrate diet has unfavorable effects on inflammatory markers with reduction in adiponectin levels (76, 77), an effect that is prevented if weight loss is achieved (78). Similarly, a low-fat diet accompanied by weight loss in subjects with IGT was associated with a significant reduction of CRP and fibrinogen levels (79) and PAI-1 (80).

### **Antihyperglycemic agents**

Metformin lowered CRP levels in subjects with IGT, T2D, or polycystic ovarian syndrome, but this could be explained by weight and HbA1c reduction (79, 81). It had no effect on PAI-1 levels in one study (81), whereas in another TNF $\alpha$ , PAI-1, tPA, vWF, and adhesion markers were reduced compared with repaglinide treatment, which was not associated with any improvements (82). In subjects with IGT, metformin reduced markers of endothelial dysfunction independently of changes in weight or insulin sensitivity but not PAI-1, TNF $\alpha$ , or CRP (83). Thus, metformin is at most only mildly anti-inflammatory and profibrinolytic but may have more significant effects on endothelial function, equivalent to that seen with the

thiazolidinediones (84). However, the thiazolidinediones have also been shown to have powerful antiinflammatory as well as other vasculoprotective effects, reducing CRP, PAI-1, TNF $\alpha$ , and IL-6 levels and increasing adiponectin concentrations despite weight gain (85). These effects have been shown to occur within a few days of instituting treatment, before glucose levels are reduced (86). Inflammatory markers as well as PAI-1 are lowered by insulin treatment in decompensated diabetes (58), and a constant insulin infusion achieving euglycemia significantly lowers elevated inflammatory, ROS, and procoagulant markers in acutely stressed subjects with hyperglycemia (65). However, there is little evidence that improving glycemic control with basal or intensive insulin therapy in nonstressed subjects reduces markers of inflammation with T1D or T2D, although there have been reports of modestly beneficial effects on PAI-1 and endothelial function markers (59, 87, 88).

Whereas these findings raise optimism that clinical benefits may accrue from the apparently advantageous changes in markers of inflammation, endothelial function, and coagulation susceptibility induced by lifestyle change and antihyperglycemic treatments, there have been few long-term studies of either the durability of these effects or their importance for the development of diabetes or its complications, and these are sorely needed.

### **Biomarkers and diabetic microangiopathy**

The classical pathophysiological determinants of diabetic microangiopathy, namely hyperglycemia, and hypertension are accompanied by heightened inflammatory activity, endothelial dysfunction, and disturbed coagulation (89–91), and these processes may constitute final common pathways to the vascular complications of diabetes. They may also underlie the association between obesity and insulin resistance with diabetic microangiopathy (92–94). Recent clinical studies are beginning to support the concept that elevated inflammatory factors and markers of endothelial dysfunction are associated with or predictive of microangiopathy.

### **Nephropathy**

There is considerable experimental evidence that proinflammatory and adhesion molecules are important in the development of diabetic nephropathy (95). Cross-sectional studies in both T1D and T2D have shown that biomarker levels including CRP and adhesion molecules are increased in subjects with nephropathy (96, 97) (Fig. 3). In the Diabetes Control and Complications Trial, baseline E-selectin and fibrinogen levels but not CRP independently predicted development of nephropathy in T1D (98). In another prospective study, a composite endothelial dysfunction biomarker score contributed to mainly by sVCAM-1 and PAI-1 was independently predictive of pro-

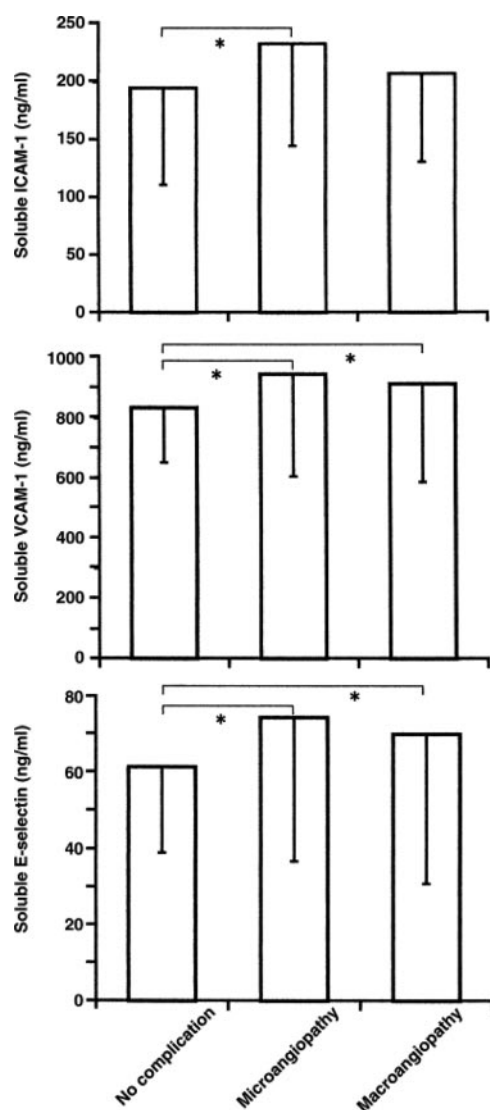

**FIG. 3.** Serum levels (mean  $\pm$  sd) of sICAM-1, VCAM-1, and E-selectin in T2D subjects with no complications, a microangiopathy-dominant group, and a macroangiopathy-dominant group. \*,  $P < 0.05$ . [Reproduced with permission from K. Matsumoto *et al.*: *Diabet Med* 19:822–826. 2002 (97). ©The Endocrine Society.]

gression of renal disease in T1D (99) over a 10-yr period of observation. Interestingly TGF $\beta$ , which is considered to be a key mediator of renal fibrosis, had no predictive effect in this study. A *post hoc* analysis of the Irbesartan in Patients with Type 2 Diabetes and Microalbuminuria trial also demonstrated that a composite endothelial dysfunction but not an inflammation score was an independent predictor of progression of proteinuria to nephropathy (100). An additional finding is that IL-18, a proinflammatory cytokine involved in both innate and acquired immune responses, independently predicted conversion from normoalbuminuria to microalbuminuria in T2D (101). Other biomarkers such as AGEs, MCP-1, and PAI-1 have also been associated with diabetic nephropathy in small cross-sectional studies (102–104).

Several reports have shown adiponectin levels to be reduced in T2D diabetic subjects with nephropathy independent of confounders such as body weight, insulin resistance, or glycemic control (105, 106), and in one report levels were inversely associated with the degree of proteinuria (105). In contrast, a recent study found that total and high-molecular-weight adiponectin were increased in relation to nephropathy (107). Adiponectin levels are usually found to be increased in T1D subjects with nephropathy (108). No clear explanation for these rather significant disparities in findings is apparent other than the possibility that more advanced renal disease may impair adiponectin clearance, but this is unlikely to be the entire explanation. Recent studies indicated that the levels of leptin, an activator of the sympathetic nervous system that increases extracellular matrix, correlate positively with albuminuria and negatively with glomerular filtration rate (109).

### Retinopathy

As for nephropathy, pathways of inflammation, endothelial dysfunction, and coagulation are thought to be important in the pathogenesis of diabetic retinopathy (110). In one clinical study of T2D, adhesion molecules were higher in subjects with retinopathy than those without (97), and in another population-based cohort, composite scores of both inflammatory and endothelial function markers were strongly associated with the presence of diabetic retinopathy (111). Similarly E-selectin values were found to be increased in a group with T1D and retinopathy (112) but not in a group with T2D and retinopathy (113). Adiponectin levels were found to be decreased in proportion to the severity of diabetic retinopathy in T2D subjects (107), but total and high-molecular-weight adiponectin were increased in the advanced stages of retinopathy in another (114).

### Neuropathy

The role of subclinical inflammation in the development of diabetic neuropathy is less clear. A small study in T1D found increased levels of TNF $\alpha$  in subjects with diabetic neuropathy (115) and a recent report found that CRP was independently associated with development of diabetic neuropathy (116). It was also shown that the level of circulating heat shock protein 27, which has a role in cytoprotection and cell motility and is overexpressed in dorsal root ganglia in experimental diabetes perhaps as a compensatory mechanism, was associated with distal sensorimotor neuropathy (117).

Overall, the findings constitute a clinical database supporting the concept that diabetic microangiopathy is accompanied by elevated levels of inflammatory and endo-

thelial dysfunction biomarkers in a manner that was frequently independent of hyperglycemia and hypertension. Although most of the data demonstrate associative relationships only, at least two prospective studies suggest that markers of endothelial dysfunction in particular are predictive of diabetic nephropathy. These data are also important in that they suggest that pathways of inflammation and endothelial dysfunction are common features to both development of diabetes as well as its vascular complications. A unifying hypothesis would posit that inflammation occurs early in the development of diabetes along with increased adiposity and insulin resistance, contributing to  $\beta$ -cell damage. Unabated proinflammatory activity together with metabolic deterioration and endothelial damage could then combine to produce a diffuse vasculopathy. A distinctive, clinically useful biomarker of microangiopathic risk does not clearly emerge from these studies, although markers of endothelial dysfunction such as sVCAM-1, E-selectin, or vWF or a composite inflammation/endothelium dysfunction score, *e.g.* CRP and sVCAM-1, would appear to have predictive value and could represent treatment targets for diabetic nephropathy and retinopathy. In this regard it is of considerable interest that PPAR $\gamma$  and PPAR $\alpha$  agonists, which have antiinflammatory and vasculoprotective properties, also have beneficial effects on progression of nephropathy and retinopathy (85, 118).

### Biomarkers and diabetic macrovascular disease

#### **Markers of inflammation and endothelial dysfunction are predictive of diabetic macrovascular outcomes and mortality**

**T2D.** It is accepted that standard cardiovascular disease (CVD) risk factors do not adequately explain the excess CVD in diabetes, and heightened inflammation, endothelial dysfunction, and coagulation imbalance have been shown to be important in atherogenesis. The Hoorn population-based study was the first to show that vWF, sVCAM-1, and CRP were predictors of mortality over a 5- to 7-yr period in T2D subjects (119, 120). Similar findings were obtained in another 9-yr observational study of T2D in which vWF, E-selectin, CRP, tPA, and fibrinogen were shown to be independent predictors of progression of microalbuminuria and mortality (121). After this, several studies showed strong relationships between CRP and CHD events (122, 123) in subjects with T2D. In the largest of these, a CRP value greater than 3 mg/liter was an independent predictor of CHD death over an 8-yr period of follow-up (123). In an extended 11.7-yr follow-up of the Hoorn population, CRP and sICAM-1 as indices of inflammation and vWF and sVCAM-1 as indices of endothelial dysfunction were independently associated with increased CVD mortality, together explaining about 43% of

the excess CVD risk (93) (Fig. 4). Endothelial dysfunction appears to be a greater hazard for CVD in T2D compared with nondiabetic subjects, attesting to the greater specificity or severity of endothelial dysfunction in diabetes as a marker of CVD (39, 121). The relationship of adiponectin to CVD is complex, with both positive and negative associations being reported (124). Adiponectin values were shown to be inversely related with CHD events in the one study reported in T2D; this relationship appeared to be mediated by high-density lipoprotein levels, with which adiponectin is strongly associated (125). Elevated markers of inflammation and endothelial dysfunction as well as decreased adiponectin may result from increased oxidative stress, and one fairly large cross-sectional study of T2D subjects demonstrated an inverse association between a measure of plasma antioxidant status and CHD, independent of traditional risk factors (126).

**T1D.** CRP, IL-6, and TNF $\alpha$  were independently associated with CVD events as well as microangiopathy in T1D (127, 128); sVCAM-1 and E-selectin also correlated with CVD events, but this effect was dependent on the presence of microalbuminuria. There is as yet no information on whether the elevated adiponectin levels found in T1D are related to atherosclerosis risk.

### Biomarkers and subclinical atherosclerosis

Given the poor prognosis of established CVD in diabetes, there is interest in identifying new markers of subclinical atherosclerosis such as coronary artery calcium (CAC) and carotid intimal medial thickness (CIMT) to facilitate earlier diagnosis and prevention of CVD. There may be limitations to this approach because there are studies that show, for example, that CIMT is not a useful predictor of CHD in T1D (129). With that caveat, CRP levels were found to correlate with CIMT in a group of

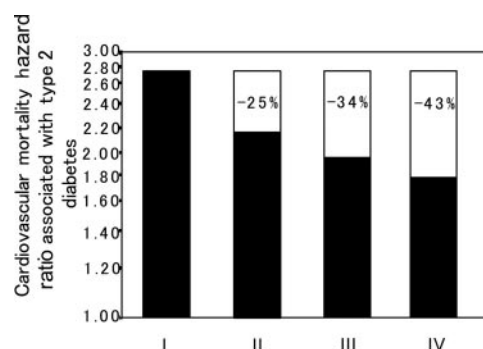

**FIG. 4.** Hazard ratio of cardiovascular mortality associated with T2D after adjustment for stratification variables (I), low-grade inflammation (II), endothelial dysfunction (III), and both low-grade inflammation and endothelial dysfunction (IV), showing percent reduction in mortality in each case. [Reproduced with permission from J. de Jager *et al.*: *Arterioscler Thromb Vasc Biol*;26:1086–1093. 2006 (39). ©The Endocrine Society.]

young T1D subjects (130) but not in older T2D individuals (131), and in another study of T2D, levels of IL-6 were associated with the amount of CAC (132). A marker of enhanced innate immunity, CD40 ligand, was also found to correlate with CIMT in subjects with T1D (133). Leptin levels were shown to associate with CAC in T2D, independently of body weight measures or other risk factors, pointing to a possible proatherogenic role for leptin (134). Recently in T1D subjects, cystatin C levels were also found to predict the extent of CAC (135) and asymmetrical dimethylarginine, a natural inhibitor of NO synthesis that is elevated by hyperglycemia and renal failure, was shown to be associated with risk of CVD events and decline of renal function (136). Lastly, in a group of T2D subjects, the circulating AGE pentosidine was shown to correlate with CIMT and aortic pulse wave velocity, a marker of arterial stiffness that is increased in diabetes (137).

Overall, these data demonstrate that markers of inflammation, particularly CRP, and endothelial dysfunction, have independent predictive value for clinical and subclinical CVD beyond traditional risk factors in diabetes. Whereas CRP appears to be the most robust inflammatory marker for potential clinical use, a clear advantage for any one biomarker of endothelial dysfunction does not emerge. vWF requires special handling of samples and therefore would not be suitable for clinical use. A composite score for sICAM-1, sVCAM-1, and E-selectin might be the most effective way to assess the risk predictive value of markers of endothelial dysfunction but would certainly add to expense, and these assays have not been standardized. Thus, CRP is the single biomarker with both predictive ability for CVD in diabetes and assay versatility in this setting; based on these features, CRP has been proposed for risk assessment of CHD in the at-risk general population. The recent demonstration that an elevated CRP level helps to identify apparently healthy individuals who will benefit from statin therapy, even though their low-density lipoprotein cholesterol levels were acceptable, raises the possibility that CRP could function as a marker for more aggressive atheropreventive strategies in younger, uncomplicated subjects with diabetes, in whom the benefit of aggressive statin therapy is not established.

## Conclusion

Based on these findings, particularly the data from prospective studies, it seems unavoidable to conclude that biomarkers of inflammation, endothelial dysfunction, and coagulation can help to identify subjects at risk for developing diabetes, diabetic microangiopathy, and CVD. Many of the interventions used to treat diabetes can be shown to ameliorate these disturbances, although it remains to be proven that this will slow or delay disease. The

challenge ahead is to more precisely characterize the clinical diagnostic and therapeutic value of the most promising of these biomarkers, namely CRP. The expanding impact of diabetes on health calls for novel approaches such as this.

## Acknowledgments

Address all correspondence and requests for reprints to: Ronald B. Goldberg, M.D., Professor of Medicine, 1450 NW 10th Avenue, Miami, Florida 33101. E-mail: rgoldberg@med.miami.edu.

This work was not supported by the National Institutes of Health, but the author is a National Institutes of Health-supported investigator.

Disclosure Summary: The author has received lecture fees from and consulted for Daiichi Sankyo, Merck, and Takeda North America and receives research support from Sanofi-Aventis.

## References

1. Ballantyne CM, Nambi V 2005 Markers of inflammation and their clinical significance. *Atheroscler Suppl* 6:21–29 (Review)
2. Cardozo AK, Kruhøffer M, Leeman R, Orntoft T, Eizirik DL 2001 Identification of novel cytokine-induced genes in pancreatic  $\beta$ -cells by high-density oligonucleotide arrays. *Diabetes* 50:909–920
3. Christiansen T, Richelsen B, Bruun JM 2005 Monocyte chemoattractant protein-1 is produced in isolated adipocytes, associated with adiposity and reduced after weight loss in morbid obese subjects. *Int J Obes (Lond)* 29:146–150
4. Libby P 2002 Inflammation in atherosclerosis. *Nature* 420:868–874
5. Ehses JA, Böni-Schnetzler M, Faulenbach M, Donath MY 2008 Macrophages, cytokines and beta-cell death in type 2 diabetes. *Biochem Soc Trans* 36(Pt 3):340–342
6. Griending KK, FitzGerald GA 2003 Oxidative stress and cardiovascular injury: part I: basic mechanisms and *in vivo* monitoring of ROS. *Circulation* 108:1912–1916
7. Ceriello A, Motz E 2004 Is oxidative stress the pathogenic mechanism underlying insulin resistance, diabetes, and cardiovascular disease? The common soil hypothesis revisited. *Arterioscler Thromb Vasc Biol* 24:816–823
8. Papanicolaou DA, Vgontzas AN 2000 Interleukin-6: the endocrine cytokine. *J Clin Endocrinol Metab* 85:1331–1333
9. Libby P, Ridker PM 2004 Inflammation and atherosclerosis: role of C-reactive protein in risk assessment. *Am J Med* 116(Suppl 6A):9S–16S
10. Rajala MW, Scherer PE 2003 Minireview: the adipocyte—at the crossroads of energy homeostasis, inflammation, and atherosclerosis. *Endocrinology* 144:3765–3773
11. Suganami T, Nishida J, Ogawa Y 2005 A paracrine loop between adipocytes and macrophages aggravates inflammatory changes. Role of free fatty acids and tumor necrosis factor  $\alpha$ . *Arterioscler Thromb Vasc Biol* 25:2062–2068
12. Berg AH, Combs TP, Du X, Brownlee M, Scherer PE 2001 The adipocyte-secreted protein Acrp30 enhances hepatic insulin action. *Nat Med* 7:947–953
13. Ouchi N, Kihara S, Arita Y, Okamoto Y, Maeda K, Kuriyama H, Hotta K, Nishida M, Takahashi M, Muraguchi M, Ohmoto Y, Nakamura T, Yamashita S, Funahashi T, Matsuzawa Y 2000 Adiponectin, adipocyte-derived plasma protein, inhibits endothelial NF- $\kappa$ B signaling through cAMP-dependent pathway. *Circulation* 102:1296–1301



14. Rakatzi I, Mueller H, Ritzeler O, Tennagels N, Eckel J 2004 Adiponectin counteracts cytokine- and fatty acid-induced apoptosis in the pancreatic  $\beta$ -cell line INS-1. *Diabetologia* 47:249–258
15. Matsuzawa Y 2005 Adiponectin: Identification, physiology and clinical relevance in metabolic and vascular disease. *Atheroscler Suppl* 6:7–14
16. Toso C, Emamaullee A, Merani S, Sapiro AMJ 2008 The role of macrophage migration inhibition factor on glucose metabolism and diabetes. *Diabetologia* 51:1937–1946
17. Nicoletti F, Conget I, Di Marco R, Speciale AM, Morinigo R, Bendtzen K, Gomis R 2001 Serum levels of the interferon- $\gamma$ -inducing cytokine interleukin-18 are increased in individuals at high risk of developing type I diabetes. *Diabetologia* 44:309–311
18. Nicoletti F, Conget I, Di Mauro M, Di Marco R, Mazzarino MC, Bendtzen K, Messina A, Gomis R 2002 Serum concentrations of the interferon- $\gamma$ -inducible chemokine IP-10/CXCL10 are augmented in both newly diagnosed type I diabetes mellitus patients and subjects at risk of developing the disease. *Diabetologia* 45:1107–1110
19. Hanifi-Moghaddam P, Kappler S, Seissler J, Müller-Schölze S, Martin S, Roep BO, Strassburger K, Kolb H, Schloot NC 2006 Altered chemokine levels in individuals at risk of type 1 diabetes mellitus. *Diabet Med* 23:156–163
20. Chase HP, Cooper S, Osberg I, Stene LC, Barriga K, Norris J, Eisenbarth GS, Rewers M 2004 Elevated C-reactive protein levels in the development of type 1 diabetes. *Diabetes* 53:2569–2573
21. Pickup JC, Mattock MB, Chusney GD, Burt D 1997 NIDDM as a disease of the innate immune system: association of acute-phase reactants and interleukin-6 with metabolic syndrome X. *Diabetologia* 40:1286–1292
22. Shoelson SE, Lee J, Goldfine AB 2006 Inflammation and insulin resistance. *J Clin Invest* 116:1793–1801
23. Varma V, Yao-Borengasser A, Rasouli N, Nolen GT, Phanavanh B, Starks T, Gurley CM, Simpson PM, McGehee Jr RE, Kern PA, Peterson CA 2009 Muscle inflammatory response and insulin resistance: synergistic interaction between macrophages and fatty acids leads to impaired insulin action. *Am J Physiol Endocrinol Metab* 296:E1300–E1310
24. Schmidt MI, Duncan BB, Sharrett AR, Lindberg G, Savage PJ, Offenbacher S, Azambuja MI, Tracy RP, Heiss G 1999 Markers of inflammation and prediction of diabetes mellitus in adults (Atherosclerosis Risk in Communities study): a cohort study. *Lancet* 353:1649–1652
25. Duncan BB, Schmidt MI, Offenbacher S, Wu KK, Savage PJ, Heiss G 1999 Factor VIII and other hemostasis variables are related to incident diabetes in adults. The Atherosclerosis Risk in Communities (ARIC) Study. *Diabetes Care* 22:767–772
26. Festa A, D'Agostino Jr R, Tracy RP, Haffner SM; Insulin Resistance Atherosclerosis Study 2002 Elevated levels of acute-phase proteins and plasminogen activator inhibitor-1 predict the development of type 2 diabetes: the insulin resistance atherosclerosis study. *Diabetes* 51:1131–1137
27. Liu S, Tinker L, Song Y, Rifai N, Bonds DE, Cook NR, Heiss G, Howard BV, Hotamisligil GS, Hu FB, Kuller LH, Manson JE 2007 A prospective study of inflammatory cytokines and diabetes mellitus in a multiethnic cohort of postmenopausal women. *Arch Intern Med* 167:1676–1685
28. Eliasson MC, Jansson JH, Lindahl B, Stegmayr B 2003 High levels of tissue plasminogen activator (tPA) antigen precede the development of type 2 diabetes in a longitudinal population study. The Northern Sweden MONICA study. *Cardiovasc Diabetol* 2:19
29. Meigs JB, O'Donnell CJ, Tofler GH, Benjamin EJ, Fox CS, Lipinska I, Nathan DM, Sullivan LM, D'Agostino RB, Wilson PW 2006 Hemostatic markers of endothelial dysfunction and risk of incident type 2 diabetes: the Framingham Offspring Study. *Diabetes* 55:530–537
30. Festa A, Williams K, Tracy RP, Wagenknecht LE, Haffner SM 2006 Progression of plasminogen activator inhibitor-1 and fibrinogen levels in relation to incident type 2 diabetes. *Circulation*. 113:1753–1759
31. Lee CC, Adler AI, Sandhu MS, Sharp SJ, Forouhi NG, Erqou S, Luben R, Bingham S, Khaw KT, Wareham NJ 2009 Association of C-reactive protein with type 2 diabetes: prospective analysis and meta-analysis. *Diabetologia* 52:1040–1047
32. Herder C, Baumert J, Thorand B, Koenig W, de Jager W, Meisinger C, Illig T, Martin S, Kolb H 2006 Chemokines as risk factors for type 2 diabetes: results from the MONICA/KORA Augsburg study, 1984–2002. *Diabetologia* 49:921–929
33. Rosen P, Nawroth PP, King G, Moller W, Tritschler HJ, Packer L 2001 The role of oxidative stress in the onset and progression of diabetes and its complications: a summary of a Congress Series sponsored by UNESCO-MCBN, the American Diabetes Association and the German Diabetes Society. *Diabetes Metab Res Rev* 17:189–212
34. Schwenke DC, D'Agostino Jr RB, Goff Jr DC, Karter AJ, Rewers MJ, Wagenknecht LE; Insulin Resistance Atherosclerosis Study 2003 Differences in LDL oxidizability by glycemic status: the insulin resistance atherosclerosis study. *Diabetes Care* 26:1449–1455
35. Il'yasova D, Morrow JD, Wagenknecht LE 2005 Urinary F2-isoprostanes are not associated with increased risk of type 2 diabetes. *Obes Res* 13:1638–1644
36. Ceriello A, Mercuri F, Quagliaro L, Assaloni R, Motz E, Tonutti L, Taboga C 2001 Detection of nitrotyrosine in the diabetic plasma: evidence of oxidative stress. *Diabetologia* 44:834–838
37. Bo S, Gambino R, Guidi S, Silli B, Gentile L, Cassader M, Pagano GF 2005 Plasma nitrotyrosine levels, antioxidant vitamins and hyperglycaemia. *Diabet Med* 22:1185–1189
38. Meigs JB, Larson MG, Fox CS, Keaney Jr JF, Vasan RS, Benjamin EJ 2007 Association of oxidative stress, insulin resistance, and diabetes risk phenotypes: the Framingham Offspring Study. *Diabetes Care* 30:2529–2535
39. de Jager J, Dekker JM, Kooy A, Kostense PJ, Nijpels G, Heine RJ, Bouter LM, Stehouwer CD 2006 Endothelial dysfunction and low-grade inflammation explain much of the excess cardiovascular mortality in individuals with type 2 diabetes: the Hoorn Study. *Arterioscler Thromb Vasc Biol* 26:1086–1093
40. Meigs JB, Hu FB, Rifai N, Manson JE 2004 Biomarkers of endothelial dysfunction and risk of type 2 diabetes mellitus. *JAMA* 291:1978–1986
41. Lindsay RS, Funahashi T, Hanson RL, Matsuzawa Y, Tanaka S, Tataranni PA, Knowler WC, Krakoff J 2002 Adiponectin and development of type 2 diabetes in the Pima Indian population. *Lancet* 360:57–58
42. Duncan BB, Schmidt MI, Pankow JS, Bang H, Couper D, Ballantyne CM, Hoogeveen RC, Heiss G 2004 Adiponectin and the development of type 2 diabetes: the atherosclerosis risk in communities study. *Diabetes* 53:2473–2478
43. Snehialatha C, Mukesh B, Simon M, Viswanathan V, Haffner SM, Ramachandran A 2003 Plasma adiponectin is an independent predictor of type 2 diabetes in Asian Indians. *Diabetes Care* 26:3226–3229
44. Mather KJ, Funahashi T, Matsuzawa Y, Edelstein S, Bray GA, Kahn SE, Crandall J, Marcovina S, Goldstein B, Goldberg R; Diabetes Prevention Program 2008 Adiponectin, change in adiponectin, and progression to diabetes in the Diabetes Prevention Program. *Diabetes* 57:980–986
45. Kanaya AM, Wassel Fy C, Vittinghoff E, Harris TB, Park SW, Goodpaster BH, Tykavsky F, Cummings SR 2006 Adipocytokines and incident diabetes mellitus in older adults: the independent effect of plasminogen activator inhibitor 1. *Arch Intern Med* 166:350–356
46. Hoo RL, Chow WS, Yau MH, Xu A, Tso AW, Tse HF, Fong CH, Tam S, Chan L, Lam KS 2007 Adiponectin mediates the suppressive effect of rosiglitazone on plasminogen activator inhibitor-1 production. *Arterioscler Thromb Vasc Biol* 27:2777–2782
47. Hivert MF, Sullivan LM, Fox CS, Nathan DM, D'Agostino RB Sr, Wilson PW, Meigs JB 2008 Associations of adiponectin, resistin,

- and tumor necrosis factor- $\alpha$  with insulin resistance. *J Clin Endocrinol Metab* 93:3165–3172
48. Graham TE, Yang Q, Blüher M, Hammarstedt A, Ciaraldi TP, Henry RR, Wason CJ, Oberbach A, Jansson PA, Smith U, Kahn BB 2006 Retinol-binding protein 4 and insulin resistance in lean, obese, and diabetic subjects. *N Engl J Med* 354:2552–2563
  49. Silha JV, Nyomba BL, Leslie WD, Murphy LJ 2007 Ethnicity, insulin resistance, and inflammatory adipokines in women at high and low risk for vascular disease. *Diabetes Care* 30:286–291
  50. Tso AW, Xu A, Sham PC, Wat NM, Wang Y, Fong CH, Cheung BM, Janus ED, Lam KS 2007 Serum adipocyte fatty acid binding protein as a new biomarker predicting the development of type 2 diabetes: a 10-year prospective study in a Chinese cohort. *Diabetes Care* 30:2667–2672
  51. Stefan N, Fritsche A, Weikert C, Boeing H, Joost HG, Häring HU, Schulze MB 2008 Plasma fetuin-A levels and the risk of type 2 diabetes. *Diabetes* 57:2762–2767
  52. Fleischman A, Shoelson SE, Bernier R, Goldfine AB 2008 Salsalate improves glycemia and inflammatory parameters in obese young adults. *Diabetes Care* 31:289–294
  53. Goldfine AB, Silver R, Aldhahi W, Cai D, Tatro E, Lee J, Shoelson SE 2008 Use of salsalate to target inflammation in the treatment of insulin resistance and type 2 diabetes. *Clin Transl Sci* 1:36–43
  54. Dandona P, Chaudhuri A, Ghanim H, Mohanty P 2007 Proinflammatory effects of glucose and anti-inflammatory effect of insulin: relevance to cardiovascular disease. *Am J Cardiol* 99: 15B–26B
  55. Lindmark S, Burén J, Eriksson JW 2006 Insulin resistance, endocrine function and adipokines in type 2 diabetes patients at different glycaemic levels: potential impact for glucotoxicity *in vivo*. *Clin Endocrinol (Oxf)* 65:301–309
  56. King DE, Mainous 3rd AG, Buchanan TA, Pearson WS 2003 C-reactive protein and glycemic control in adults with diabetes. *Diabetes Care* 26:1535–1539
  57. Mantzoros CS, Li T, Manson JE, Meigs JB, Hu FB 2005 Circulating adiponectin levels are associated with better glycemic control, more favorable lipid profile, and reduced inflammation in women with type 2 diabetes. *J Clin Endocrinol Metab* 90:4542–4548
  58. Stentz FB, Umpierrez GE, Cuervo R, Kitabchi AE 2004 Proinflammatory cytokines, markers of cardiovascular risks, oxidative stress, and lipid peroxidation in patients with hyperglycemic crises. *Diabetes* 53:2079–2086
  59. Heliövaara MK, Teppo AM, Karonen SL, Tuominen JA, Ebeling P 2006 Improved glycaemia in type 1 diabetes results in decreased levels of soluble adhesion molecules with no change in serum adiponectin or most acute phase proteins. *Exp Clin Endocrinol Diabetes* 114:295–300
  60. Schulze MB, Rimm EB, Shai I, Rifai N, Hu FB 2004 Relationship between adiponectin and glycemic control, blood lipids, and inflammatory markers in men with type 2 diabetes. *Diabetes Care* 27:1680–1687
  61. Barnes MM, Curran-Everett D, Hamman RF, Maahs D, Mayer-Davis EJ, D'Agostino Jr RB, West N, Dabelea D 2008 Determinants of adiponectin levels in young people with type 1 diabetes. *Diabet Med* 25:365–369
  62. John S, Yudkin, Stehouwer CDA, Emeis JJ, Coppack SW 1999 C-reactive protein in healthy subjects: associations with obesity, insulin resistance, and endothelial dysfunction: a potential role for cytokines originating from adipose tissue? *Arterioscler Thromb Vasc Biol* 19:972–978
  63. Godsland IF, Crook D, Proudler AJ, Stevenson JC 2005 Hemostatic risk factors and insulin sensitivity, regional body fat distribution, and the metabolic syndrome. *J Clin Endocrinol Metab* 90:190–197
  64. Urakawa H, Katsuki A, Sumida Y, Gabazza EC, Murashima S, Morioka K, Maruyama N, Kitagawa N, Tanaka T, Hori Y, Nakatani K, Yano Y, Adachi Y 2003 Oxidative stress is associated with adiposity and insulin resistance in men. *J Clin Endocrinol Metab* 88:4673–4676
  65. Dandona P, Aljada A, Bandyopadhyay A 2004 Inflammation: the link between insulin resistance, obesity and diabetes *Trends Immunol* 25:4–7
  66. Festa A, D'Agostino Jr R, Howard G, Mykkanen L, Tracy RP, Haffner SM 2000 Chronic subclinical inflammation as part of the insulin resistance syndrome: the Insulin Resistance Atherosclerosis Study (IRAS). *Circulation* 102:42–47
  67. The Diabetes Prevention Program Research Group 2005 Lipid, lipoproteins, C-reactive protein, and hemostatic factors at baseline in the diabetes prevention program. *Diabetes Care* 28:2472–2479
  68. Natali A, Toschi E, Baldeweg S, Ciociaro D, Favilla S, Sacca L, Ferrannini E 2006 Clustering of insulin resistance with vascular dysfunction and low-grade inflammation in type 2 diabetes. *Diabetes* 55:1133–1140
  69. Hung J, McQuillan BM, Thompson PL, Beilby JP 2008 Circulating adiponectin levels associate with inflammatory markers, insulin resistance and metabolic syndrome independent of obesity. *Int J Obes (Lond)* 32:772–779
  70. van Oostrom AJ, van Wijk J, Cabezas MC 2004 Lipaemia, inflammation and atherosclerosis: novel opportunities in the understanding and treatment of atherosclerosis. *Drugs* 64(Suppl 2):19–41
  71. Savoia C, Schiffrin EL 2006 Inflammation in hypertension. *Curr Opin Nephrol Hypertens* 15:152–158
  72. Dietrich M, Jialal I 2005 The effect of weight loss on a stable biomarker of inflammation, C-reactive protein. *Nutr Rev* 63: 22–28
  73. Ziccardi P, Nappo F, Giugliano G, Esposito K, Marfella R, Cioffi M, D'Andrea F, Molinari AM, Giugliano D 2002 Reduction of inflammatory cytokine concentrations and improvement of endothelial functions in obese women after weight loss over one year. *Circulation* 105:804–809
  74. Plaisance EP, Grandjean PW 2006 Physical activity and high-sensitivity C-reactive protein. *Sports Med* 36:443–458
  75. Esposito K, Marfella R, Ciotola M, Di Palo C, Giugliano F, Giugliano G, D'Armiento M, D'Andrea F, Giugliano D 2004 Effect of a Mediterranean-style diet on endothelial dysfunction and markers of vascular inflammation in the metabolic syndrome: a randomized trial. *JAMA* 292:1440–1446
  76. Roberts CK, Won D, Pruthi S, Lin SS, Barnard RJ 2006 Effect of a diet and exercise intervention on oxidative stress, inflammation and monocyte adhesion in diabetic men. *Diabetes Res Clin Pract* 73:249–259
  77. Pischon T, Girman CJ, Rifai N, Hotamisligil GS, Rimm EB 2005 Association between dietary factors and plasma adiponectin concentrations in men. *Am J Clin Nutr* 81:780–786
  78. Kasim-Karakas SE, Tsodikov A, Singh U, Jialal I 2006 Responses of inflammatory markers to a low-fat, high-carbohydrate diet: effects of energy intake. *Am J Clin Nutr* 83:774–779
  79. Haffner S, Temprosa M, Crandall J, Fowler S, Goldberg R, Horton E, Marcovina S, Mather K, Orchard T, Ratner R, Barrett-Connor E; Diabetes Prevention Program Research Group 2005 Intensive lifestyle intervention or metformin on inflammation and coagulation in participants with impaired glucose tolerance. *Diabetes* 54: 1566–1572
  80. Hamalainen H, Ronnema T, Virtanen A, Lindstrom J, Eriksson JG, Valle TT, Ilanne-Parikka P, Keinanen-Kiukaanniemi S, Rastas M, Aunola S, Uusitupa M, Tuomilehto J; Finnish Diabetes Prevention Study Group 2005 Improved fibrinolysis by an intensive lifestyle intervention in subjects with impaired glucose tolerance. The Finnish Diabetes Prevention Study. *Diabetologia* 48:2248–2253
  81. Nagi DK, Yudkin JS 1993 Effects of metformin on insulin resistance, risk factors for cardiovascular disease, and plasminogen activator inhibitor in NIDDM subjects. A study of two ethnic groups. *Diabetes Care* 16:621–629
  82. Lund SS, Tarnow L, Stehouwer CD, Schalkwijk CG, Teerlink T,

- Gram J, Winther K, Frandsen M, Smidt UM, Pedersen O, Parving HH, Vaag AA 2008 Impact of metformin versus repaglinide on non-glycaemic cardiovascular risk markers related to inflammation and endothelial dysfunction in non-obese patients with type 2 diabetes. *Eur J Endocrinol* 158:631–641
83. Caballero AE, Delgado A, Aguilar-Salinas CA, Herrera AN, Castillo JL, Cabrera T, Gomez-Perez FJ, Rull JA 2004 The differential effects of metformin on markers of endothelial activation and inflammation in subjects with impaired glucose tolerance: a placebo-controlled, randomized clinical trial. *J Clin Endocrinol Metab* 89:3943–3948
  84. Jensterle M, Sebestjen M, Janez A, Prezelj J, Kocjan T, Keber I, Pfeifer M 2008 Improvement of endothelial function with metformin and rosiglitazone treatment in women with polycystic ovary syndrome. *Eur J Endocrinol* 159:399–406
  85. Reynolds K, Goldberg RB 2006 Thiazolidinediones: beyond glycemic control. *Treat Endocrinol* 5:25–36
  86. Pfützner A, Marx N, Lübben G, Langenfeld M, Walcher D, Konrad T, Forst T 2005 Improvement of cardiovascular risk markers by pioglitazone is independent from glycemic control: results from the pioneer study. *J Am Coll Cardiol* 45:1925–1931
  87. Fonseca VA, Theuma P, Mudaliar S, Leissinger CA, Clejan S, Henry RR 2006 Diabetes treatments have differential effects on nontraditional cardiovascular risk factors. *J Diabetes Complications* 20:14–20
  88. Albertini JP, Valensi P, Lormeau B, Aurousseau MH, Ferrière F, Attali JR, Gattegno L 1998 Elevated concentrations of soluble E-selectin and vascular cell adhesion molecule-1 in NIDDM. Effect of intensive insulin treatment. *Diabetes Care* 21:1008–1013
  89. Giugliano D, Ceriello A, Esposito K 2008 Glucose metabolism and hyperglycemia. *Am J Clin Nutr* 87:217S–222S
  90. Landmesser U, Drexler H 2007 Endothelial function and hypertension. *Curr Opin Cardiol* 22:316–320
  91. Orasanu G, Plutzky J 2009 The pathologic continuum of diabetic vascular disease. *J Am Coll Cardiol* 53(Suppl 5):S35–S42
  92. Costa LA, Canani LH, Lisbôa HR, Tres GS, Gross JL 2004 Aggregation of features of the metabolic syndrome is associated with increased prevalence of chronic complications in type 2 diabetes. *Diabet Med* 21:252–255
  93. De Block CE, De Leeuw IH, Van Gaal LF 2005 Impact of overweight on chronic microvascular complications in type 1 diabetic patients. *Diabetes Care* 28:1649–1655
  94. Kang ES, Kim HJ, Ahn CW, Park CW, Cha BS, Lim SK, Kim KR, Lee HC 2005 Relationship of serum high sensitivity C-reactive protein to metabolic syndrome and microvascular complications in type 2 diabetes. *Diabetes Res Clin Pract* 69:151–159
  95. Mora C, Navarro JF 2006 Inflammation and diabetic nephropathy. *Curr Diab Rep* 6:463–468
  96. Targher G, Bertolini L, Zoppini G, Zenari L, Falezza G 2005 Increased plasma markers of inflammation and endothelial dysfunction and their association with microvascular complications in type 1 diabetic patients without clinically manifest macroangiopathy. *Diabet Med* 22:999–1004
  97. Matsumoto K, Sera Y, Ueki Y, Inukai G, Niuro E, Miyake S 2002 Comparison of serum concentrations of soluble adhesion molecules in diabetic microangiopathy and macroangiopathy. *Diabet Med* 19:822–826
  98. Lopes-Virella MF, Carter RE, Gilbert GE, Klein RL, Jaffa M, Jenkins AJ, Lyons TJ, Garvey WT, Virella G; Diabetes Control and Complications Trial/Epidemiology of Diabetes Intervention and Complications Cohort Study Group 2008 Risk factors related to inflammation and endothelial dysfunction in the DCCT/EDIC cohort and their relationship with nephropathy and macrovascular complications. *Diabetes Care* 31:2006–2012
  99. Astrup AS, Tarnow L, Pietraszek L, Schalkwijk CG, Stehouwer CD, Parving HH, Rossing P 2008 Markers of endothelial dysfunction and inflammation in type 1 diabetic patients with or without diabetic nephropathy followed for 10 years: association with mortality and decline of glomerular filtration rate. *Diabetes Care* 31:1170–1176
  100. Persson F, Rossing P, Hovind P, Stehouwer CD, Schalkwijk CG, Tarnow L, Parving HH 2008 Endothelial dysfunction and inflammation predict development of diabetic nephropathy in the Irbesartan in Patients with Type 2 Diabetes and Microalbuminuria (IRMA 2) study. *Scand J Clin Lab Invest* 68:731–738
  101. Araki S, Haneda M, Koya D, Sugimoto T, Isshiki K, Chin-Kanasaki M, Uzu T, Kashiwagi A 2007 Predictive impact of elevated serum level of IL-18 for early renal dysfunction in type 2 diabetes: an observational follow-up study. *Diabetologia* 50:867–873
  102. Kamgar M, Nobakhtaghghi N, Shamshirsaz AA, Estacio RO, McFann KK, Schrier RW 2006 Impaired fibrinolytic activity in type II diabetes: correlation with urinary albumin excretion and progression of renal disease. *Kidney Int* 69:1899–1903
  103. Tesch GH 2008 MCP-1/CCL2: a new diagnostic marker and therapeutic target for progressive renal injury in diabetic nephropathy. *Am J Physiol Renal Physiol* 294:F697–F701
  104. Hwang JS, Shin CH, Yang SW, Jung SY, Huh N 2005 Clinical implications of N  $\epsilon$ -(carboxymethyl)lysine, advanced glycation end product, in children and adolescents with type 1 diabetes. *Diabetes Obes Metab* 7:263–267
  105. Yenicesu M, Yilmaz MI, Caglar K, Sonmez A, Eyleten T, Kir T, Acikel C, Bingol N, Oguz Y, Ikizler TA, Vural A 2005 Adiponectin level is reduced and inversely correlated with the degree of proteinuria in type 2 diabetic patients. *Clin Nephrol* 64:12–19
  106. Lin J, Hu FB, Curhan G 2007 Serum adiponectin and renal dysfunction in men with type 2 diabetes. *Diabetes Care* 30:239–244
  107. Kato K, Osawa H, Ochi M, Kusunoki Y, Ebisui O, Ohno K, Ohashi J, Shimizu I, Fujii Y, Tanimoto M, Makino H 2008 Serum total and high molecular weight adiponectin levels are correlated with the severity of diabetic retinopathy and nephropathy. *Clin Endocrinol (Oxf)* 68:442–449
  108. Hadjadj S, Aubert R, Fumeron F, Pean F, Tichet J, Roussel R, Marre M; SURGENE Study Group; DESIR Study Group 2005 Increased plasma adiponectin concentrations are associated with microangiopathy in type 1 diabetic subjects. *Diabetologia* 48:1088–1092
  109. Briley LP, Szczec LA 2006 Leptin and renal disease. *Semin Dial* 19:54–59
  110. Kern TS 2007 Contributions of inflammatory processes to the development of the early stages of diabetic retinopathy. *Exp Diabetes Res* 2007:1–14
  111. van Hecke MV, Dekker JM, Nijpels G, Moll AC, Heine RJ, Bouter LM, Polak BC, Stehouwer CD 2005 Inflammation and endothelial dysfunction are associated with retinopathy: the Hoorn Study. *Diabetologia* 48:1300–1306
  112. Spijkerman AM, Gall MA, Tarnow L, Twisk JW, Lauritzen E, Lund-Andersen H, Emeis J, Parving HH, Stehouwer CD 2007 Endothelial dysfunction and low-grade inflammation and the progression of retinopathy in type 2 diabetes. *Diabet Med* 24:969–976
  113. Ersanli D, Top C, Oncül O, Aydin A, Terekci H 2007 Relationship between serum soluble E-selectin levels and development of diabetic retinopathy in patients with type 2 diabetes. *Scand J Clin Lab Invest* 67:474–479
  114. Yilmaz MI, Sonmez A, Acikel C, Celik T, Bingol N, Pinar M, Bayraktar Z, Ozata M 2004 Adiponectin may play a part in the pathogenesis of diabetic retinopathy. *Eur J Endocrinol* 151:135–140
  115. González-Clemente JM, Mauricio D, Richart C, Broch M, Caixàs A, Megia A, Giménez-Palop O, Simón I, Martínez-Riquelme A, Giménez-Pérez G, Vendrell 2005 Diabetic neuropathy is associated with activation of the TNF- $\alpha$  system in subjects with type 1 diabetes mellitus. *J Clin Endocrinol (Oxf)* 63:525–529
  116. Herder C, Lankisch M, Ziegler D, Rathmann W, Koenig W, Illig T, Döring A, Thorand B, Holle R, Giani G, Martin S, Meisinger C 2009 Subclinical inflammation and diabetic polyneuropathy: MONICA/KORA Survey F3 (Augsburg, Germany). *Diabetes Care* 32:680–682



117. Gruden G, Bruno G, Chaturvedi N, Burt D, Schalkwijk C, Pinach S, Stehouwer CD, Witte DR, Fuller JH, Perin PC; EURODIAB Prospective Complications Study Group 2008 Serum heat shock protein 27 and diabetes complications in the EURODIAB prospective complications study: a novel circulating marker for diabetic neuropathy. *Diabetes* 57:1966–1970
118. Staels B, Maes M, Zambon A 2008 Fibrates and future PPAR $\alpha$  agonists in the treatment of cardiovascular disease. *Nat Clin Pract Cardiovasc Med* 5:542–553
119. Jager A, van Hinsbergh VW, Kostense PJ, Emeis JJ, Yudkin JS, Nijpels G, Dekker JM, Heine RJ, Bouter LM, Stehouwer CD 1999 von Willebrand factor, C-reactive protein, and 5-year mortality in diabetic and nondiabetic subjects: the Hoorn Study. *Arterioscler Thromb Vasc Biol* 19:3071–3078
120. Jager A, van Hinsbergh VW, Kostense PJ, Emeis JJ, Nijpels G, Dekker JM, Heine RJ, Bouter LM, Stehouwer CD 2000 Increased levels of soluble vascular cell adhesion molecule 1 are associated with risk of cardiovascular mortality in type 2 diabetes: the Hoorn study *Diabetes* 49:485–491
121. Stehouwer CD, Gall MA, Twisk JW, Knudsen E, Emeis JJ, Parving HH 2002 Increased urinary albumin excretion, endothelial dysfunction, and chronic low-grade inflammation in type 2 diabetes: progressive, interrelated, and independently associated with risk of death. *Diabetes* 51:1157–1165
122. Schulze MB, Rimm EB, Li T, Rifai N, Stampfer MJ, Hu FB 2004 C-reactive protein and incident cardiovascular events among men with diabetes. *Diabetes Care* 27:889–894
123. Soinio M, Marniemi J, Laakso M, Lehto S, Rönnemaa T 2006 High-sensitivity C-reactive protein and coronary heart disease mortality in patients with type 2 diabetes: a 7-year follow-up study. *Diabetes Care* 29:329–333
124. Sattar N, Nelson SM 2008 Adiponectin, diabetes, and coronary heart disease in older persons: unraveling the paradox. *J Clin Endocrinol Metab* 93:3299–3301
125. Schulze MB, Shai I, Rimm EB, Li T, Rifai N, Hu FB 2005 Adiponectin and future coronary heart disease events among men with type 2 diabetes. *Diabetes* 54:534–539:889–894
126. Stephens JW, Gable DR, Hurel SJ, Miller GJ, Cooper JA, Humphries SE 2006 Increased plasma markers of oxidative stress are associated with coronary heart disease in males with diabetes mellitus and with 10-year risk in a prospective sample of males. *Clin Chem* 52:446–452
127. Schram MT, Chaturvedi N, Schalkwijk CG, Fuller JH, Stehouwer CD; EURODIAB Prospective Complications Study Group 2005 Markers of inflammation are cross-sectionally associated with microvascular complications and cardiovascular disease in type 1 diabetes—the EURODIAB Prospective Complications Study. *Diabetologia* 48:370–378
128. Soedamah-Muthu SS, Chaturvedi N, Schalkwijk CG, Stehouwer CD, Ebeling P, Fuller JH; The EURODIAB Prospective Complications Study group 2006 Soluble vascular cell adhesion molecule-1 and soluble E-selectin are associated with micro- and macrovascular complications in type 1 diabetic patients. *J Diabetes Complications* 20:188–195
129. Epidemiology of Diabetes Interventions and Complications (EDIC) Research Group 1999 Effect of intensive diabetes treatment on carotid artery wall thickness in the epidemiology of diabetes interventions and complications. *Diabetes* 48:383–390
130. Hayaishi-Okano R, Yamasaki Y, Katakami N, Ohtoshi K, Gorogawa S, Kuroda A, Matsuhisa M, Kosugi K, Nishikawa N, Kajimoto Y, Hori M 2002 Elevated C-reactive protein associates with early-stage carotid atherosclerosis in young subjects with type 1 diabetes. *Diabetes Care* 25:1432–1438
131. Sigurdardottir V, Fagerberg B, Hulthe J 2004 Preclinical atherosclerosis and inflammation in 61-year-old men with newly diagnosed diabetes and established diabetes. *Diabetes Care* 27:880–884
132. Saremi A, Anderson RJ, Luo P, Moritz TE, Schwenke DC, Allison M, Reaven PD; for the VADT 2009 Association between IL-6 and the extent of coronary atherosclerosis in the veterans affairs diabetes trial (VADT). *Atherosclerosis* 203:610–614
133. Katakami N, Kaneto H, Matsuhisa M, Miyatsuka T, Sakamoto K, Kawamori D, Yoshiuchi K, Nakamura Y, Kato K, Yamamoto K, Kosugi K, Hori M, Yamasaki Y 2006 Association of soluble CD40 ligand with carotid atherosclerosis in Japanese type 1 diabetic patients. *Diabetologia* 49:1670–1676
134. Reilly MP, Iqbal N, Schutta M, Wolfe ML, Scally M, Localio AR, Rader DJ, Kimmel SE 2004 Plasma leptin levels are associated with coronary atherosclerosis in type 2 diabetes. *J Clin Endocrinol Metab* 89:3872–3878
135. Maahs DM, Ogden LG, Kretowski A, Snell-Bergeon JK, Kinney GL, Berl T, Rewers M 2007 Serum cystatin C predicts progression of subclinical coronary atherosclerosis in individuals with type 1 diabetes. *Diabetes* 56:2774–2779
136. Lajer M, Tarnow L, Jorsal A, Teerlink T, Parving HH, Rossing P 2008 Plasma concentration of asymmetric dimethylarginine (ADMA) predicts cardiovascular morbidity and mortality in type 1 diabetic patients with diabetic nephropathy. *Diabetes Care* 31:747–752
137. Yoshida N, Okumura K, Aso Y 2005 High serum pentosidine concentrations are associated with increased arterial stiffness and thickness in patients with type 2 diabetes. *Metabolism* 54:345–350
